# Supplementary material for: Change of Kidney Function Is Associated With All‐Cause Mortality and Cardiovascular Diseases: Results From the Kailuan Study
Source: PubMed Central journal article supplement — J Am Heart Assoc. 2018 Oct 24;7(21):e010596. doi: 10.1161/JAHA.118.010596 (PMC6404220; doi:10.1161/jaha.118.010596), 2018-10-24
Supplement: JAH3-7-e010596-s001.pdf [file JAH3-7-e010596-s001.pdf]

# **SUPPLEMENTAL MATERIAL**

**Table S1. Characteristics of participants died and ascertained CVD during the follow up.**

| Characteristics            | Quintiles of percentage annual change in eGFR (percent/year) |                        |                       |                      |                       | P value |
|----------------------------|--------------------------------------------------------------|------------------------|-----------------------|----------------------|-----------------------|---------|
|                            | Q1<br>(-52.78 to -5.08)                                      | Q2<br>(-5.07 to -1.02) | Q3<br>(-1.03 to 1.16) | Q4<br>(1.16 to 5.34) | Q5<br>(5.34 to 59.99) |         |
| <b>All-cause mortality</b> |                                                              |                        |                       |                      |                       |         |
| n (%)                      | 419 (6.00%)                                                  | 420 (5.81%)            | 377 (5.54%)           | 382 (5.49%)          | 397 (5.53%)           | <0.001  |
| Age (year; mean±SD)        | 60.77±8.94                                                   | 60.18±8.97             | 59.12±9.29            | 58.03±8.69           | 59.16±8.87            | <0.001  |
| Male sex (%)               | 80.79                                                        | 78.93                  | 77.62                 | 77.91                | 80.01                 | <0.001  |
| <b>CVD</b>                 |                                                              |                        |                       |                      |                       |         |
| n (%)                      | 266 (3.83%)                                                  | 262 (3.69%)            | 250 (3.62%)           | 241 (3.52%)          | 260 (3.58%)           | <0.001  |
| Age (year; mean±SD)        | 60.02±9.22                                                   | 58.23±9.16             | 58.04±8.78            | 57.98±8.54           | 58.50±9.07            | <0.001  |
| Male sex (%)               | 81.83                                                        | 80.65                  | 76.61                 | 78.99                | 82.04                 | <0.001  |
